# Supplementary material for: The long non-coding RNA H19 suppresses carcinogenesis and chemoresistance in hepatocellular carcinoma
Source: PubMed Central journal article supplement (PMC6551655; doi:10.15698/cst2017.10.105), 2017-08-25
Supplement: ces-01-037-s01.pdf [file ces-01-037-s01.pdf]

**THE LONG NON-CODING RNA *H19* SUPPRESSES CARCINOGENESIS AND  
CHEMORESISTANCE IN HEPATOCELLULAR CARCINOMA**

Christina S. Schultheiss, Stephan Laggai, Beate Czepukojc, Usama K. Hussein, Markus List, Ahmad Barghash, Sascha Tierling, Kevan Hosseini, Nicole Golob-Schwarzl, Juliane Pokorny, Nina Hachenthal, Marcel Schulz, Volkhard Helms, Jörn Walter, Vincent Zimmer, Frank Lammert, Rainer M. Bohle, Luisa Dandolo, Johannes Haybaeck, Alexandra K. Kiemer, Sonja M. Kessler

**Supplementary information**

Supplemental Table S1: Target gene-specific primer information

Supplemental Figure S1: Plasmid map and H19-sequence

Supplemental Figure S2: H19 expression in lasermicrodissected hepatocytes

Supplemental Figure S3: Effect of *H19* overexpression on colony formation ability

## SUPPLEMENT

Supplemental Table S1: Target gene-specific primer information

| mRNA                         | forward primer<br>sequence 5' → 3' | reverse primer<br>sequence 5' → 3' | gene bank accession no.                                                     | AT<br>[°C] | product<br>size<br>[bp] | primer<br>concentration<br>[μM] |
|------------------------------|------------------------------------|------------------------------------|-----------------------------------------------------------------------------|------------|-------------------------|---------------------------------|
| <i>hu ABCB1/<br/>hu MDR1</i> | GCTATAATGCGA<br>CAGGAGATAGGCT      | CATTCCAATTTTGT<br>CACCAATAACTT     | NM_001348946.1;NM_001348945.1;NM_001348944.1                                | 56         | 116                     | 0.2                             |
| <i>hu ACTB</i>               | TGCGTGACATTAA<br>GGAGAAG           | GTCAGGCAGCTC<br>GTAGCTCT           | NM_001101.3                                                                 | 60         | 107                     | 0.2                             |
| <i>hu ELAVL1</i>             | GGTGACATCGGG<br>AGAACGAA           | CCAAGCTGTGTCC<br>TGCTACT           | NM_001419.2                                                                 | 60         | 142                     | 0.2                             |
| <i>hu H19</i>                | TTCAAAGCCTCCA<br>CGACTCT           | CTGAGACTCAAGG<br>CCGTCTC           | NR_131224.1;NR_131223.1<br>;NR_002196.2;NM_0012931<br>71.2                  | 60         | 100                     | 0.2                             |
| <i>hu H19 IP</i>             | GCTCCCAGAACCC<br>ACAACAT           | CCTTCCAGAGCCG<br>ATTCTCTG          | NR_131224.1;NR_131223.1<br>;NR_002196.2;NM_0012931<br>71.2                  | 61         | 149                     | 0.2                             |
| <i>hu IGF2</i>               | GGACTTGAGTCCC<br>TGAACCA           | TGAAAATTCCCGT<br>GAGAAGG           | NM_000612.5;NM_0010071<br>39.5;NM_001127598.2;NM_001291861.2;NM_001291862.2 | 56         | 100                     | 0.25                            |
| <i>mu H19</i>                | CAGAGGTGGATGT<br>GCCTGCC           | CGGACCATGTCAT<br>GTCTTTCTGTC       | NR_001592.1                                                                 | 60         | 80                      | 0.25                            |
| <i>mu Igf2</i>               | GGAAGTCGATGTT<br>GGTGCTTCTC        | CGAACAGACAAAC<br>TGAAGCGTGT        | NM_010514.3                                                                 | 60         | 121                     | 0.2                             |
| <i>mu Csnk2a2</i>            | GTAAAGGACCCTG<br>TGTCAAAGA         | GTCAGGATCTGGT<br>AGAGTTGCT         | NM_009974.3                                                                 | 60         | 85                      | 0.4                             |
| miRNA                        | forward primer<br>sequence 5' → 3' | reverse primer<br>sequence 5' → 3' | accession no.                                                               | AT<br>[°C] |                         | primer<br>concentration<br>[μM] |
| <i>hsa-miR-675</i>           | TGGTGCGGAAAG<br>GGCCACAGT          | GAATCGAGCACCA<br>GTTACGCAT         | MIMAT0004284                                                                | 64         |                         | 0.2                             |
| <i>RNU6B</i>                 | ACGCAAATTCGTG<br>AAGCGTT           | GAATCGAGCACCA<br>GTTACG            | e.g. NR_125730.1                                                            | 55         |                         | 0.5                             |

A

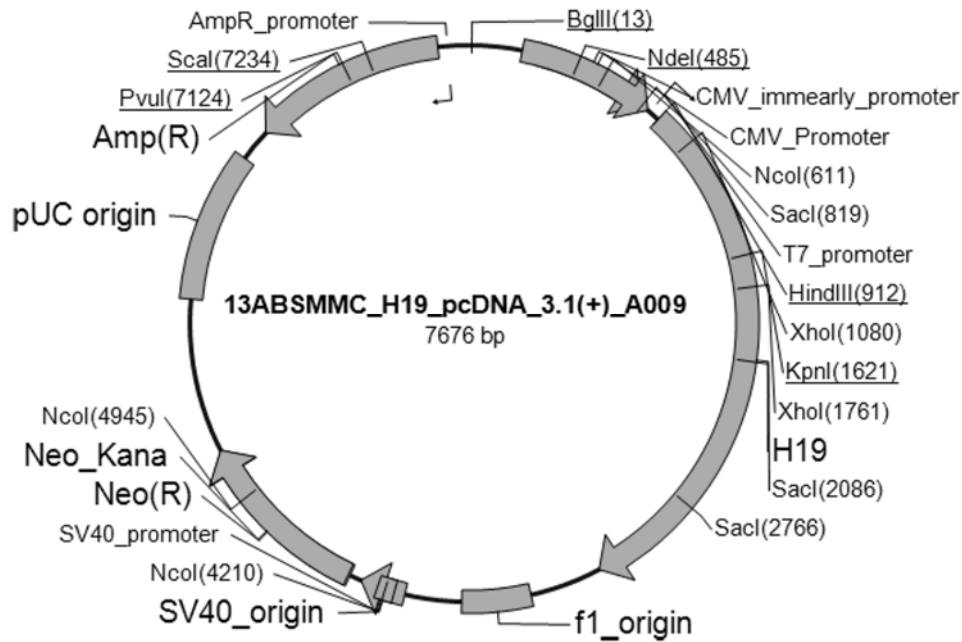

B

AAGCTTGGGAGGGGGTGGGATGGGTGGGGGGTAACGGGGGAAACTGGGGAAGTGGGGAACCGAGGGGCAACCAGG  
 GGAAGATGGGGTGTGGAGGAGAGCTTGTGGGAGCCAAGGAGCACCTTGGACATCTGGAGTCTGGCAGGAGTGATGA  
 CGGGTGGAGGGGCTAGCTCGAGGCAGGGCTGGTGGGGCCTGAGGCCAGTGAGGAGTGTGGAGTAGGCGCCAGGCA  
 TCGTGCAGACAGGGCGACATCAGCTGGGGACGATGGGCCTGAGCTAGGGCTGGAAGAAGGGGGAGCCAGGCATTCA  
 TCCCGGTCACTTTTGGTTACAGGACGTGGCAGCTGGTTGGACGAGGGGAGCTGGTGGGCAGGGTTTATCCCAGGGC  
 CTGGGCAACGGAGGTGTAGCTGGCAGCAGCGGGCAGGTGAGGACCCATCTGCCGGGCAGGTGAGTCCCTTCCCTCC  
 CCAGGCCTCGTTCAGCCTTCTGAAAGAAGGAGGTTTAGGGGATCGAGGGCTGGCGGGGAGAAGCAGACACCCT  
 CCCAGCAGAGGGGCAGGATGGGGCAGGAGAGTTAGCAAAGGTGACATCTTCTCGGGGGAGCCGAGACTGCGCAA  
 GGCTGGGGGTTATGGGCCCTCCAGGCAGAAAGAGCAAGAGGGCAGGGAGGGAGCACAGGGGTGGCCAGCGTAG  
 GGTCCAGCAGCTGGGGTGTACCCAGGCCTGGGTGAGCAGGGACATGGCAGGGGACACAGGACAGAGGGGTCCC  
 CAGCTGCCACCTACCCACCGCAATTCATTTAGTAGCAGGCACAGGGGCAGCTCCGGCACGGCTTTCTCAGGCCTATG  
 CCGGAGCCTCGAGGGCTGGAGAGCGGGAAGACAGGCAGTGCTCGGGGAGTTGCAGCAGGACGTCACCAGGAGGGCG  
 AAGCGGCCACGGGAGGGGGGCCCCGGGACATTGCGCAGCAAGGAGGCTGCAGGGGCTCGGCCTGCGGGCGCCGGT  
 CCCACGAGGCACTGCGGCCAGGGTCTGGTGGGAGAGGGCCACAGTGGACTTGGTGACGCTGTATGCCCTACCG  
 CTCAGCCCCTGGGGCTGGCTTGGCAGACAGTACAGCATCCAGGGGAGTCAAGGGCATGGGGCGAGACCAGACTAGGC  
 GAGGCGGGCGGGCGGAGTGAATGAGCTCTCAGGAGGGAGGATGGTGCAGGCAGGGGTGAGGAGCGCAGCGGGCG  
 GCGAGCGGGAGGCACTGGCCTCCAGAGCCCCTGGCCAAGGCGGGCCTCGCGGGCGGCGACGGAGCCGGGATCGGT  
 GCCTCAGCGTTCGGGCTGGAGACGAGGCCAGGTCTCCAGCTGGGGTGGACGTGCCACCAGCTGCCGAAGGCCAAG  
 ACGCCAGGTCCGGTGGACGTGACAAGCAGGACATGACATGGTCCGGTGTGACGGCGAGGACAGAGGAGGCGCGTCC  
 GGCCTTCTGAACACCTTAGGCTGGTGGGGCTGCGGCAAGAAGCGGGTCTGTTTCTTACTTCTCCACGAGTCCGC  
 AACTATGGCTGCCCTCTGGGCTCCAGAACCACAACATGAAAGAATGGTGTACCCAGCTCAAGCCTGGGCCTTTG  
 AATCCGGACACAAAACCTCTAGCTTGGAAATGAATATGCTGCATTTACAACCACTGCACTACCTGACTCAGGAATCGG  
 CTCTGGAAGGTGAAGCTAGAGGAACCAGACCTCATCAGCCCAACATCAAAGACACCATCGGAACAGCAGCGCCCGCAG  
 CACCCACCCCGCACCGGGCACTCCATCTTATGGCCACCCCTGCGGGCGGACGGTTGACCACCAGCCACCACATCATC  
 CCAGAGCTGAGCTCCTCCAGCGGGATGACGCCGTCCCAACCACCTCCCTTCTTCTTTTTCATCCTTCTGTCTTTGT  
 TTCTGAGCTTCTGTCTTTCTTTTCTGAGAGATTCAAAGCCTCCAGACTCTGTTTCCCCCGTCCCTTCTGAATTA

ATTGCACTAAGTCATTTGCACTGGTTGGAGTTGTGGAGACGGCCTTGAGTCTCAGTACGAGTGTGCGTGAGTGTGAGC  
CACCTTGGCAAGTGCCTGTGCAGGGCCCGGCCGCCCTCCATCTGGGCCGGGTGACTGGGCGCCGGCTGTGTGCCCCG  
AGGCCTCACCCCTGCCCTAGCTGGAAGCTCCGACCGACATCACGGAGCAGCCTTCAAGCATTCCATTACGCCC  
CATCTCGCTCTGTGCCCCCTCCCACCAGGGCTTCAGCAGGAGCCCTGGACTCATCATCAATAAACACTGTTACAGCAA  
AAAAAAAAAAAAATCTAGA

*Supplemental Figure S1: (A) Plasmid map (pcDNA3.1(+)\_A009) and (B) H19-sequence (2334 bp).*

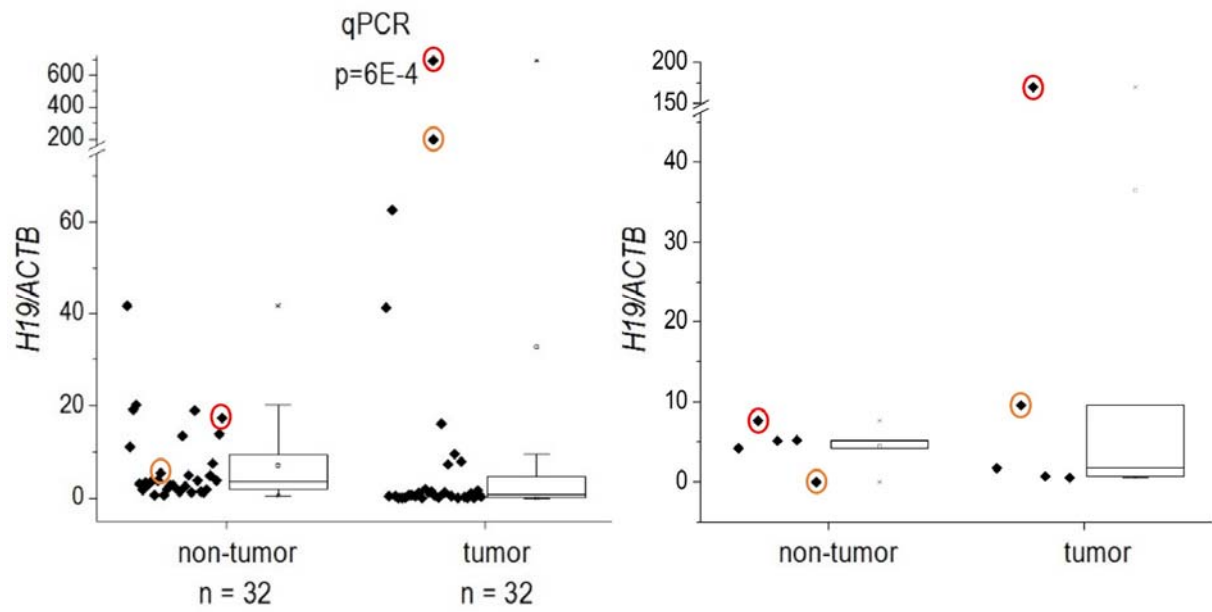

*Supplemental Figure S2: H19 expression in HCC tissues from Saarland University Medical Center determined by qPCR (each, n=32, Mann-Whitney U test; see Figure 1D). Highlighted are the two highest expressing HCC tissues and corresponding normal tissues, from which hepatocytes were microdissected and compared with hepatocytes from three low expressing HCC tissues.*

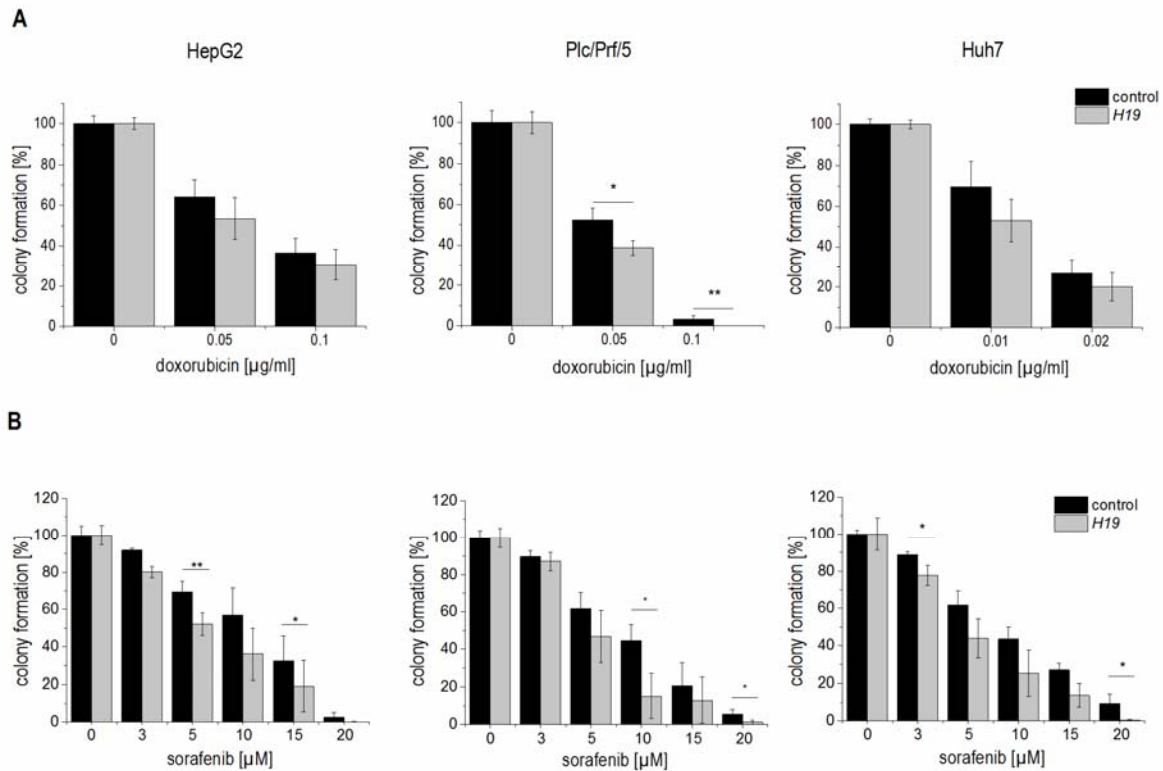

*Supplemental Figure S3: Effect of H19 overexpression on colony formation ability in stably H19 overexpressing (H19) and vector control (control, co) HepG2 (left panels), Plc/Prf/5 (middle panels), and Huh7 (right panels) cells. (A, B) Colony formation ability of control or H19 cells normalized to their respective untreated controls after (A) doxorubicin (n≥3, duplicates) or (B) sorafenib (n=3, triplicates) treatment. The p values were calculated by two-sample t-test or Mann-Whitney *U* test depending on the data distribution. \* p < 0.05, \*\* p < 0.01, \*\*\* p < 0.001.*
